# Supplementary material
Source: publisher figshare collection journal article supplement (https://acs.figshare.com/ndownloader/files/12544505)
Supplement: Supplementary file 1 [file 12544505]

		GPR88 cAMP assay
Compound	SMILE	EC50 (nM)
1	O=C([C@H]1[C@H](C2=CC=CC=N2)C1)N(C[C@H]([C@H](CC)C)N)C3=CC=C(C4=CC=C(CCC)C=C4)C=C3	126
4a	O=C([C@H]1[C@H](C2=CC=CC=N2)C1)N(CCN)C3=CC=C(C4=CC=C(CCC)C=C4)C=C3	501
4b	O=C([C@H]1[C@H](C2=CC=CC=N2)C1)N(C[C@H](C)N)C3=CC=C(C4=CC=C(CCC)C=C4)C=C3	398
4c	O=C([C@H]1[C@H](C2=CC=CC=N2)C1)N(CC(C)(C)N)C3=CC=C(C4=CC=C(CCC)C=C4)C=C3	316
4d	O=C([C@H]1[C@H](C2=CC=CC=N2)C1)N(C[C@H](C(C)C)N)C3=CC=C(C4=CC=C(CCC)C=C4)C=C3	158
4e	O=C([C@H]1[C@H](C2=CC=CC=N2)C1)N(C[C@H](CC(C)C)N)C3=CC=C(C4=CC=C(CCC)C=C4)C=C3	126
4f	O=C([C@H]1[C@H](C2=CC=CC=N2)C1)N(C[C@H](C3=CC=CC=C3)N)C4=CC=C(C5=CC=C(CCC)C=C5)C=C4	1260
4g	O=C([C@H]1[C@H](C2=CC=CC=N2)C1)N(C[C@H](CC3=CC=CC=C3)N)C4=CC=C(C5=CC=C(CCC)C=C5)C=C4	501
4h	O=C([C@H]1[C@H](C2=CC=CC=N2)C1)N(C[C@H]([C@H](OC)C)N)C3=CC=C(C4=CC=C(CCC)C=C4)C=C3	63
5a	O=C([C@H]1[C@H](C2=CC=CC=N2)C1)N(C[C@H]([C@H](OC)C)N)C3=CC=C(C4=CC=C(OC)C=C4)C=C3	126
5b	O=C([C@H]1[C@H](C2=CC=CC=N2)C1)N(C[C@H]([C@H](OC)C)N)C3=CC=C(C4=CC=C(OCC)C=C4)C=C3	100
6	O=C([C@H]1[C@H](C2=CC=CC=N2)C1)N(C[C@H]([C@H](OC)C)N)C3=CC=C(C4=CC=C(OCC)C=C4)C=C3	25
